# Supplementary material
Source: Copernicus journal article supplement (doi:10.5194/soil-12-521-2026)
Supplement: Supplementary file 1 [file soil-12-521-2026-supplement.pdf]

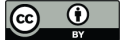

*Supplement of*

## **Formation of mineral-associated organic matter via rock weathering: an experimental test for the organo-metallic glue hypothesis**

**Kaori Matsuoka et al.**

*Correspondence to:* Kaori Matsuoka ([matsuoka.kaori811@naro.go.jp](mailto:matsuoka.kaori811@naro.go.jp), [kaori.matsuoka@hotmail.co.jp](mailto:kaori.matsuoka@hotmail.co.jp)) and Rota Wagai ([wagai@g.ecc.u-tokyo.ac.jp](mailto:wagai@g.ecc.u-tokyo.ac.jp))

The copyright of individual parts of the supplement might differ from the article licence.

## Supplementary tables and figures

### Tables S1-S14

**Table S1.** Major elements ( $\text{g kg}^{-1}$ ) in the initial granite, basaltic rocks, sand, and leaf compost materials used to prepare rock-OM mixtures for the incubation experiment.

|                             | Si  | Ti   | Al  | Fe  | Mn    | Mg   | Ca  | Na   | K   | P    |
|-----------------------------|-----|------|-----|-----|-------|------|-----|------|-----|------|
| Granite 38–75 $\mu\text{m}$ | 310 | 0.67 | 69  | 14  | 0.40  | N.D. | 8.4 | 33   | 34  | N.D. |
| Basalt 38–75 $\mu\text{m}$  | 255 | 4.8  | 83  | 78  | 1.3   | 42   | 64  | 18   | 4.6 | 0.71 |
| Basalt 20–38 $\mu\text{m}$  | 251 | 7.2  | 85  | 87  | 1.7   | 38   | 66  | 18   | 4.0 | 0.60 |
| Sand 100–300 $\mu\text{m}$  | 394 | 0.43 | 17  | 2.3 | 0.066 | N.D. | 2.1 | 3.6  | 11  | N.D. |
| Leaf compost                | 56  | 0.41 | 8.6 | 6.9 | 0.50  | 3.1  | 33  | N.D. | 3.7 | 1.1  |

Total elemental compositions were determined by XRF analysis (NEX CG, Rigaku Corporation, Tokyo, Japan).

$n = 1$

N.D. Not detected.

**Table S2.** Specific surface area ( $\text{m}^2 \text{g}^{-1}$ ) and extractable Al, Fe, and Si ( $\text{mg g}^{-1}$ ) in the initial granite, basaltic rock, and sand used to prepare the rock-OM mixtures.

|                             | Specific surface area |                 |                 | Sodium pyrophosphate (PP) |                   |                 | Acid oxalate (OX) |               |               | Dithionite-citrate (DC) |               |               | Total |  |  |
|-----------------------------|-----------------------|-----------------|-----------------|---------------------------|-------------------|-----------------|-------------------|---------------|---------------|-------------------------|---------------|---------------|-------|--|--|
|                             | Al                    | Fe              | Si              | Al                        | Fe                | Si              | Al                | Fe            | Si            | Al                      | Fe            | Si            |       |  |  |
| Granite 38–75 $\mu\text{m}$ | N.D.                  | N.D.            | N.D.            | 0.29 $\pm$ 0.01           | 0.77 $\pm$ 0.02   | 0.21 $\pm$ 0.01 | 0.35 $\pm$ 0.13   | 3.3 $\pm$ 1.1 | 1.7 $\pm$ 0.6 | 0.64 $\pm$ 0.13         | 4.0 $\pm$ 1.1 | 1.9 $\pm$ 0.7 |       |  |  |
| Basalt 38–75 $\mu\text{m}$  | 0.17 $\pm$ 0.01       | 0.35 $\pm$ 0.03 | 0.59 $\pm$ 0.06 | 5.6 $\pm$ 0.1             | 32 $\pm$ 1        | 3.4 $\pm$ <0.1  | 0.82 $\pm$ 0.05   | 5.8 $\pm$ 0.8 | 10 $\pm$ 1    | 6.6 $\pm$ 0.1           | 38 $\pm$ 2    | 14 $\pm$ 1    |       |  |  |
| Basalt 20–38 $\mu\text{m}$  | 0.22 $\pm$ 0.04       | 0.47 $\pm$ 0.07 | 0.76 $\pm$ 0.15 | 6.8 $\pm$ 0.8             | 40 $\pm$ 1        | 4.8 $\pm$ 0.7   | 0.77 $\pm$ 0.25   | 5.3 $\pm$ 1.6 | 7.8 $\pm$ 2.4 | 7.8 $\pm$ 0.9           | 46 $\pm$ 1    | 13 $\pm$ 3    |       |  |  |
| Sand 100–300 $\mu\text{m}$  | N.D.                  | N.D.            | N.D.            | 0.027 $\pm$ 0.015         | 0.091 $\pm$ 0.027 | N.D.            | 0.32 $\pm$ 0.24   | 2.9 $\pm$ 1.9 | 1.2 $\pm$ 1.1 | 0.35 $\pm$ 0.23         | 3.0 $\pm$ 1.9 | 1.2 $\pm$ 1.1 |       |  |  |

Al, Fe, and Si were extracted sequentially with sodium pyrophosphate, acid oxalate, and dithionite-citrate.

Value shows mean  $\pm$  standard deviation ( $n = 3$  for granite, basalts, and sand).

N.D. Not detected.

**Table S3.** Masses of the rock-OM mixtures before and after the 55-day incubation.

|                             | Before<br>(g)                                             | After<br>(g)     |
|-----------------------------|-----------------------------------------------------------|------------------|
| Granite 38–75 $\mu\text{m}$ | 20.00 g (crushed mineral) + 2.50 g (leaf compost) = 22.50 | 22.12 $\pm$ 0.03 |
| Basalt 38–75 $\mu\text{m}$  | same as above                                             | 22.44 $\pm$ 0.12 |
| Basalt 20–38 $\mu\text{m}$  | same as above                                             | 22.43 $\pm$ 0.18 |
| Sand 100–300 $\mu\text{m}$  | same as above                                             | 22.42 $\pm$ 0.12 |

Expressed on an air-dried basis.

Value shows mean  $\pm$  standard deviation ( $n = 3$ ).

**Table S4.** Gravimetric water content in the rock-OM mixtures at the start and end of wet-and-dry cycles during the 55-day incubation.

|                             | Wet condition<br>(%) | Dry condition<br>(%) |
|-----------------------------|----------------------|----------------------|
| Granite 38–75 $\mu\text{m}$ | 62 $\pm$ 1           | $\sim$ 0             |
| Basalt 38–75 $\mu\text{m}$  | 62 $\pm$ 1           | $\sim$ 0             |
| Basalt 20–38 $\mu\text{m}$  | 63 $\pm$ 1           | $\sim$ 0             |
| Sand 100–300 $\mu\text{m}$  | 52 $\pm$ 4           | $\sim$ 0             |

The average water content of eight wet-and-dry cycles, expressed on an air-dried basis.

Value shows mean  $\pm$  standard deviation ( $n = 3$ ).

**Table S5.** Sample mass used for each analysis of the bulk rock-OM mixtures and meso-density fraction after the 55-day incubation.

| Fractionation / Measurement                  | Bulk                | Meso-density fraction (1.8–2.4 g cm <sup>-3</sup> ) |                 |                 |                 |
|----------------------------------------------|---------------------|-----------------------------------------------------|-----------------|-----------------|-----------------|
|                                              | All four treatments | Granite 38–75 μm                                    | Basalt 38–75 μm | Basalt 20–38 μm | Sand 100–300 μm |
| Density fractionation                        | 10.0 g              |                                                     |                 |                 |                 |
| Total C and N contents                       | 0.5 g               | ≤0.05 g                                             | ≤0.35 g         | ≤0.3 g          | ≤0.02 g         |
| C and N isotopic compositions                | N.A.                | N.A.                                                | ≤0.08 g         | ≤0.1 g          | N.A.            |
| Extractable Al, Fe, Si, Ca, and base cations | 0.1 g               | N.A.                                                | 0.1 g           | 0.1 g           | N.A.            |
| pH                                           | 0.4 g               | N.A.                                                | N.A.            | N.A.            | N.A.            |
| Image analyses (SEM, STXM-NEXAFS)            | <0.01 g             | <0.01 g                                             | <0.01 g         | <0.01 g         | N.A.            |
| Microbial DNA extraction*                    | <0.4 g              | 0.01 g                                              | 0.1 g           | 0.1 g           | N.A.            |
| Total mass                                   | <11.41              | ≤0.07                                               | ≤0.64           | ≤0.61           | ≤0.02           |

Expressed on an air-dried basis, except for microbial community analyses (on an oven-dried basis).

N.A. Not analyzed (due to the limited mass recovery of MF).

\*A composite of three replications was used for the DNA extraction due to limited sample mass.

**Table S6.** Actual masses recovered in each density fraction from the rock-OM mixtures on Day 0 and Day 55. Mean  $\pm$  standard deviation ( $n = 3$ ).

| <i>Day 0 (total mass used: 4.0 g)*</i>         | Low-density fraction<br>( $< 1.8 \text{ g cm}^{-3}$ )<br>(g) | Meso-density fraction<br>( $1.8\text{--}2.4 \text{ g cm}^{-3}$ )<br>(g) | High-density fraction<br>( $> 2.4 \text{ g cm}^{-3}$ )<br>(g) | Total<br>(g)      |
|------------------------------------------------|--------------------------------------------------------------|-------------------------------------------------------------------------|---------------------------------------------------------------|-------------------|
| Granite 38–75 $\mu\text{m}$                    | N.A.                                                         | 0.012 $\pm$ $<0.001$                                                    | 4.0 $\pm$ $<0.1$                                              | 4.0 $\pm$ $<0.1$  |
| Basalt 38–75 $\mu\text{m}$                     | N.A.                                                         | 0.27 $\pm$ $<0.01$                                                      | 3.6 $\pm$ $<0.1$                                              | 3.9 $\pm$ $<0.1$  |
| Basalt 20–38 $\mu\text{m}$                     | N.A.                                                         | 0.25 $\pm$ $<0.01$                                                      | 3.7 $\pm$ $<0.1$                                              | 3.9 $\pm$ $<0.1$  |
| Sand 100–300 $\mu\text{m}$                     | N.A.                                                         | 0.0057 $\pm$ 0.0022                                                     | 4.0 $\pm$ $<0.1$                                              | 4.0 $\pm$ $<0.1$  |
| <b><i>Day 55 (total mass used: 10.0 g)</i></b> |                                                              |                                                                         |                                                               |                   |
| Granite 38–75 $\mu\text{m}$                    | 0.91 $\pm$ 0.03                                              | 0.057 $\pm$ 0.001                                                       | 8.9 $\pm$ 0.1                                                 | 9.9 $\pm$ $<0.1$  |
| Basalt 38–75 $\mu\text{m}$                     | 0.93 $\pm$ 0.01                                              | 0.68 $\pm$ 0.04                                                         | 7.9 $\pm$ $<0.1$                                              | 9.5 $\pm$ $<0.1$  |
| Basalt 20–38 $\mu\text{m}$                     | 1.1 $\pm$ $<0.1$                                             | 1.2 $\pm$ $<0.1$                                                        | 7.2 $\pm$ $<0.1$                                              | 9.5 $\pm$ $<0.1$  |
| Sand 100–300 $\mu\text{m}$                     | 0.86 $\pm$ 0.02                                              | 0.017 $\pm$ $<0.001$                                                    | 9.1 $\pm$ $<0.1$                                              | 10.0 $\pm$ $<0.1$ |

N.A. Not analyzed.

\*The initial rocks (Day 0) were fractionated at the density of  $2.4 \text{ g cm}^{-3}$  only to isolate meso-density materials assuming that the initial leaf compost consists entirely of  $<1.8 \text{ g cm}^{-3}$  low-density materials.

**Table S7.** List of mass, C content, and extractable metal data on per bulk sample and per fraction basis, presented as figures and tables in the main text and supplementary information.

| Property                                 | Timing                              | Per bulk or fraction | LF                      | MF                                                        | HF   | Total    |
|------------------------------------------|-------------------------------------|----------------------|-------------------------|-----------------------------------------------------------|------|----------|
| Mass                                     | Initial material or mixture (Day 0) | /bulk                | N.A.                    | Fig. 3a<br>----- Table S3, S6 -----                       | N.A. | –        |
|                                          | After incubation (Day 55)           | /bulk                | N.A.                    | Fig. 3a<br>----- Fig. 2 -----<br>----- Table S3, S6 ----- | N.A. | –        |
| C content (mg g <sup>-1</sup> )          | Initial material                    | /bulk                |                         | ----- Table S8-2 -----                                    |      |          |
|                                          |                                     | /fraction            | ----- Table S8-1 -----  |                                                           | –    |          |
|                                          | After incubation                    | /bulk                | ----- Table S9-2 -----  |                                                           |      |          |
|                                          |                                     | /fraction            | ----- Table S9-1 -----  |                                                           | –    |          |
| Extractable metals (mg g <sup>-1</sup> ) | Initial material                    | /bulk                | N.A.                    | Fig. 5<br>----- Table S10-2 -----                         | N.A. | Table S2 |
|                                          |                                     | /fraction            | ----- Table S10-1 ----- |                                                           | –    |          |
|                                          | After incubation                    | /bulk                | N.A.                    | Fig. 5<br>----- Table S11 -----                           | N.A. | –        |
|                                          |                                     | /fraction            | ----- Table 2 -----     |                                                           | –    |          |

N.A. Not analyzed.

**Table S8-1.** Concentrations of C and N (mg g<sup>-1</sup> per fraction), and C:N ratio in each density fraction of the rock-OM mixtures on Day 0.

|                             | Low-density fraction<br>( $< 1.8 \text{ g cm}^{-3}$ ) |             |             | Meso plus high-density fraction*<br>( $> 1.8 \text{ g cm}^{-3}$ ) |
|-----------------------------|-------------------------------------------------------|-------------|-------------|-------------------------------------------------------------------|
|                             | C                                                     | N           | C:N ratio   | C                                                                 |
| Granite 38–75 $\mu\text{m}$ |                                                       |             |             | 0.18 $\pm <0.01$                                                  |
| Basalt 38–75 $\mu\text{m}$  | 408 $\pm <1$                                          | 10 $\pm <1$ | 41 $\pm <1$ | 0.33 $\pm 0.02$                                                   |
| Basalt 20–38 $\mu\text{m}$  |                                                       |             |             | 0.24 $\pm <0.01$                                                  |
| Sand 100–300 $\mu\text{m}$  |                                                       |             |             | 0.10 $\pm 0.02$                                                   |

Value shows mean  $\pm$  standard deviation ( $n = 3$ ).

\*C concentrations of the initial rock materials.

**Table S8-2.** Estimated distribution of C and N (mg g<sup>-1</sup> bulk), and C:N ratio in each density fraction of the rock-OM mixtures on Day 0.

|                             | Low-density fraction<br>( $< 1.8 \text{ g cm}^{-3}$ ) |                |             | Meso-density fraction*<br>( $1.8\text{--}2.4 \text{ g cm}^{-3}$ ) | High-density fraction*<br>( $> 2.4 \text{ g cm}^{-3}$ ) | Sum of three fractions |
|-----------------------------|-------------------------------------------------------|----------------|-------------|-------------------------------------------------------------------|---------------------------------------------------------|------------------------|
|                             | C                                                     | N              | C:N ratio   | C                                                                 | C                                                       | C                      |
| Granite 38–75 $\mu\text{m}$ |                                                       |                |             | 0.00048 $\pm 0.00002$                                             | 0.16 $\pm <0.01$                                        | 45 $\pm <1$            |
| Basalt 38–75 $\mu\text{m}$  | 45 $\pm <1$                                           | 1.1 $\pm <0.1$ | 41 $\pm <1$ | 0.020 $\pm <0.001$                                                | 0.27 $\pm <0.01$                                        | 46 $\pm <1$            |
| Basalt 20–38 $\mu\text{m}$  |                                                       |                |             | 0.013 $\pm <0.001$                                                | 0.20 $\pm <0.01$                                        | 46 $\pm <1$            |
| Sand 100–300 $\mu\text{m}$  |                                                       |                |             | 0.00013 $\pm 0.00005$                                             | 0.089 $\pm <0.001$                                      | 45 $\pm <1$            |

Value shows mean  $\pm$  standard deviation ( $n = 3$ ).

\*Carbon distribution between MF and HF was partitioned based on their mass distribution (Table S6) and C concentration (Table S8-1).

**Table S9-1.** Concentrations of C and N (mg g<sup>-1</sup> per fraction) and C:N ratio in each density fraction from the rock-OM mixtures on Day 55.

|                             | Low-density fraction<br>( $< 1.8 \text{ g cm}^{-3}$ ) |               |             | Meso-density fraction<br>( $1.8\text{--}2.4 \text{ g cm}^{-3}$ ) |                 |            | High-density fraction<br>( $> 2.4 \text{ g cm}^{-3}$ ) |                    |               |
|-----------------------------|-------------------------------------------------------|---------------|-------------|------------------------------------------------------------------|-----------------|------------|--------------------------------------------------------|--------------------|---------------|
|                             | C                                                     | N             | C:N ratio   | C                                                                | N               | C:N ratio  | C                                                      | N                  | C:N ratio     |
| Granite 38–75 $\mu\text{m}$ | 427 $\pm <1$                                          | 11 $\pm <1$   | 40 $\pm <1$ | 98 $\pm 3$                                                       | 5.2 $\pm <0.1$  | 20 $\pm 1$ | 0.54 $\pm <0.01$                                       | 0.080 $\pm <0.001$ | 5.1 $\pm 1.6$ |
| Basalt 38–75 $\mu\text{m}$  | 419 $\pm 5$                                           | 11 $\pm <1$   | 40 $\pm 1$  | 13 $\pm <1$                                                      | 0.78 $\pm 0.07$ | 17 $\pm 1$ | 0.87 $\pm 0.03$                                        | 0.13 $\pm 0.02$    | 7.1 $\pm 0.9$ |
| Basalt 20–38 $\mu\text{m}$  | 378 $\pm 1$                                           | 9.5 $\pm 0.1$ | 40 $\pm <1$ | 10 $\pm <1$                                                      | 0.71 $\pm 0.11$ | 15 $\pm 2$ | 1.0 $\pm <0.1$                                         | 0.15 $\pm 0.02$    | 6.9 $\pm 0.9$ |
| Sand 100–300 $\mu\text{m}$  | 431 $\pm 4$                                           | 11 $\pm <1$   | 40 $\pm 1$  | 64 $\pm 6$                                                       | 4.4 $\pm <0.1$  | 17 $\pm 2$ | 0.29 $\pm 0.01$                                        | 0.060 $\pm <0.001$ | 3.6 $\pm 1.2$ |

Value shows mean  $\pm$  standard deviation ( $n = 3$ ).

**Table S9-2.** Distribution of C and N (mg g<sup>-1</sup> bulk) across the density fractions from the rock-OM mixtures on Day 55.

|                             | Low-density fraction<br>( $< 1.8 \text{ g cm}^{-3}$ ) |                 | Meso-density fraction<br>( $1.8\text{--}2.4 \text{ g cm}^{-3}$ ) |                     | High-density fraction<br>( $> 2.4 \text{ g cm}^{-3}$ ) |                 | Sum of three fractions |                |
|-----------------------------|-------------------------------------------------------|-----------------|------------------------------------------------------------------|---------------------|--------------------------------------------------------|-----------------|------------------------|----------------|
|                             | C                                                     | N               | C                                                                | N                   | C                                                      | N               | C                      | N              |
| Granite 38–75 $\mu\text{m}$ | 39 $\pm 1$                                            | 0.99 $\pm 0.03$ | 0.55 $\pm 0.03$                                                  | 0.028 $\pm 0.002$   | 0.46 $\pm 0.02$                                        | 0.12 $\pm 0.05$ | 40 $\pm 1$             | 1.1 $\pm <0.1$ |
| Basalt 38–75 $\mu\text{m}$  | 41 $\pm <1$                                           | 1.0 $\pm <0.1$  | 0.93 $\pm 0.04$                                                  | 0.056 $\pm 0.005$   | 0.72 $\pm 0.02$                                        | 0.10 $\pm 0.01$ | 42 $\pm <1$            | 1.2 $\pm <0.1$ |
| Basalt 20–38 $\mu\text{m}$  | 43 $\pm <1$                                           | 1.1 $\pm <0.1$  | 1.3 $\pm <0.1$                                                   | 0.090 $\pm 0.013$   | 0.76 $\pm 0.01$                                        | 0.11 $\pm 0.01$ | 45 $\pm <1$            | 1.3 $\pm <0.1$ |
| Sand 100–300 $\mu\text{m}$  | 37 $\pm <1$                                           | 0.92 $\pm 0.03$ | 0.10 $\pm 0.01$                                                  | 0.0063 $\pm 0.0012$ | 0.25 $\pm 0.02$                                        | 0.10 $\pm 0.04$ | 37 $\pm <1$            | 1.0 $\pm <0.1$ |

Value shows mean  $\pm$  standard deviation ( $n = 3$ ).

**Table S10-1.** Theoretical\* concentrations (mg g<sup>-1</sup> per fraction) of extractable Al, Fe, and Si in each density fraction of the rock-OM mixtures on Day 0.

|                                                           | Sodium pyrophosphate (PP) |              |             | Acid oxalate (OX) |            |             | Dithionite-citrate (DC) |            |           | Total      |            |           |
|-----------------------------------------------------------|---------------------------|--------------|-------------|-------------------|------------|-------------|-------------------------|------------|-----------|------------|------------|-----------|
|                                                           | Al                        | Fe           | Si          | Al                | Fe         | Si          | Al                      | Fe         | Si        | Al         | Fe         | Si        |
| <i>Low-density fraction (&lt; 1.8 g cm<sup>-3</sup>)</i>  |                           |              |             |                   |            |             |                         |            |           |            |            |           |
| Leaf compost                                              | 0.075 ± 0.009             | 0.10 ± <0.01 | 4.4 ± 0.1   | 1.5 ± <0.1        | 1.5 ± <0.1 | 0.91 ± 0.05 | 0.38 ± 0.02             | 1.0 ± <0.1 | 2.2 ± 0.1 | 1.9 ± <0.1 | 2.6 ± <0.1 | 7.5 ± 0.2 |
| <i>Meso-density fraction (&lt; 2.4 g cm<sup>-3</sup>)</i> |                           |              |             |                   |            |             |                         |            |           |            |            |           |
| Basalt 38–75 μm                                           | 0.28 ± 0.01               | 0.84 ± 0.04  | 1.2 ± <0.1  | 12 ± <1           | 44 ± 1     | 6.3 ± 0.2   | 2.3 ± 0.1               | 15 ± <1    | 11 ± <1   | 14 ± <1    | 59 ± 1     | 19 ± <1   |
| Basalt 20–38 μm                                           | 0.31 ± 0.01               | 1.0 ± <0.1   | 1.2 ± <0.1  | 16 ± <1           | 59 ± 1     | 8.3 ± <0.1  | 2.4 ± <0.1              | 15 ± <1    | 10 ± <1   | 19 ± <1    | 75 ± 1     | 20 ± <1   |
| <i>High-density fraction (&gt; 2.4 g cm<sup>-3</sup>)</i> |                           |              |             |                   |            |             |                         |            |           |            |            |           |
| Basalt 38–75 μm                                           | 0.20 ± <0.01              | 0.35 ± 0.02  | 0.71 ± 0.05 | 5.4 ± 0.2         | 30 ± 1     | 3.7 ± 0.1   | 0.42 ± 0.05             | 3.5 ± 0.2  | 10 ± 1    | 6.0 ± 0.1  | 34 ± 1     | 15 ± 1    |
| Basalt 20–38 μm                                           | 0.19 ± 0.01               | 0.40 ± <0.01 | 0.92 ± 0.33 | 4.5 ± 0.1         | 31 ± 1     | 3.2 ± 0.1   | 0.41 ± 0.05             | 4.7 ± 0.3  | 10 ± <1   | 5.1 ± 0.1  | 36 ± <1    | 14 ± <1   |

Value shows mean ± standard deviation ( $n = 3$  for basalts;  $n = 2$  for leaf compost).

\*The initial rocks (Day 0) were fractionated at the density of 2.4 g cm<sup>-3</sup> to isolate the small amounts of meso-density materials assuming that the leaf compost consists fully of low-density materials.

**Table S10-2.** Theoretical\* distribution of extractable Al, Fe, and Si (mg g<sup>-1</sup> bulk) in each density fraction of the rock-OM mixtures on Day 0.

|                                                           | Sodium pyrophosphate (PP) |                |                | Acid oxalate (OX) |              |              | Dithionite-citrate (DC) |              |              | Total        |              |              |
|-----------------------------------------------------------|---------------------------|----------------|----------------|-------------------|--------------|--------------|-------------------------|--------------|--------------|--------------|--------------|--------------|
|                                                           | Al                        | Fe             | Si             | Al                | Fe           | Si           | Al                      | Fe           | Si           | Al           | Fe           | Si           |
| <i>Low-density fraction (&lt; 1.8 g cm<sup>-3</sup>)</i>  |                           |                |                |                   |              |              |                         |              |              |              |              |              |
| Leaf compost                                              | 0.0083 ± 0.0010           | 0.011 ± <0.001 | 0.49 ± 0.02    | 0.16 ± <0.01      | 0.17 ± <0.01 | 0.10 ± 0.01  | 0.042 ± 0.002           | 0.11 ± 0.01  | 0.24 ± 0.01  | 0.21 ± <0.01 | 0.29 ± <0.01 | 0.83 ± <0.01 |
| <i>Meso-density fraction (&lt; 2.4 g cm<sup>-3</sup>)</i> |                           |                |                |                   |              |              |                         |              |              |              |              |              |
| Basalt 38–75 μm                                           | 0.017 ± <0.001            | 0.051 ± <0.001 | 0.071 ± <0.001 | 0.72 ± <0.01      | 2.6 ± <0.1   | 0.38 ± <0.01 | 0.14 ± <0.01            | 0.91 ± <0.01 | 0.67 ± <0.01 | 0.88 ± <0.01 | 3.6 ± <0.1   | 1.1 ± <0.1   |
| Basalt 20–38 μm                                           | 0.017 ± <0.001            | 0.055 ± 0.001  | 0.069 ± 0.001  | 0.89 ± 0.02       | 3.3 ± 0.1    | 0.46 ± 0.01  | 0.13 ± <0.01            | 0.82 ± 0.01  | 0.56 ± 0.01  | 1.0 ± <0.1   | 4.2 ± 0.1    | 1.1 ± <0.1   |
| <i>High-density fraction (&gt; 2.4 g cm<sup>-3</sup>)</i> |                           |                |                |                   |              |              |                         |              |              |              |              |              |
| Basalt 38–75 μm                                           | 0.16 ± <0.01              | 0.29 ± <0.01   | 0.59 ± <0.01   | 4.4 ± <0.1        | 25 ± <1      | 3.0 ± <0.1   | 0.35 ± <0.01            | 2.9 ± <0.1   | 8.4 ± <0.1   | 4.9 ± <0.1   | 28 ± <1      | 12 ± <1      |
| Basalt 20–38 μm                                           | 0.16 ± <0.01              | 0.33 ± <0.01   | 0.77 ± <0.01   | 3.7 ± <0.1        | 26 ± <1      | 2.7 ± <0.1   | 0.34 ± <0.01            | 3.9 ± <0.1   | 8.3 ± <0.1   | 4.2 ± <0.1   | 30 ± <1      | 12 ± <1      |
| <i>Sum of three fractions</i>                             |                           |                |                |                   |              |              |                         |              |              |              |              |              |
| Basalt 38–75 μm                                           | 0.19 ± <0.01              | 0.35 ± <0.01   | 1.14 ± <0.01   | 5.3 ± <0.1        | 28 ± <1      | 3.5 ± <0.1   | 0.53 ± <0.01            | 3.9 ± <0.1   | 9.3 ± <0.1   | 6.0 ± <0.1   | 32 ± <1      | 14 ± <1      |
| Basalt 20–38 μm                                           | 0.18 ± <0.01              | 0.40 ± <0.01   | 1.32 ± <0.01   | 4.8 ± <0.1        | 29 ± <1      | 3.2 ± <0.1   | 0.52 ± <0.01            | 4.8 ± <0.1   | 9.1 ± <0.1   | 5.5 ± <0.1   | 35 ± <1      | 14 ± <1      |

Al, Fe, and Si were extracted sequentially with sodium pyrophosphate, acid oxalate, and dithionite-citrate.

Value shows mean  $\pm$  standard deviation ( $n = 3$  for basalts;  $n = 2$  for leaf compost).

\*See Table S10-1 footnote.

**Table S11.** Distribution of extractable Al, Fe, and Si ( $\text{mg g}^{-1}$  bulk) in each density fraction of the rock-OM mixtures on Day 55.

|                                                                               | Sodium pyrophosphate (PP) |                     |                  | Acid oxalate (OX) |                 |                   | Dithionite-citrate (DC) |                  |                   | Total             |                 |                   |
|-------------------------------------------------------------------------------|---------------------------|---------------------|------------------|-------------------|-----------------|-------------------|-------------------------|------------------|-------------------|-------------------|-----------------|-------------------|
|                                                                               | Al                        | Fe                  | Si               | Al                | Fe              | Si                | Al                      | Fe               | Si                | Al                | Fe              | Si                |
| <i>Low-density fraction (<math>&lt; 1.8 \text{ g cm}^{-3}</math>)</i>         |                           |                     |                  |                   |                 |                   |                         |                  |                   |                   |                 |                   |
| Granite 38–75 $\mu\text{m}$                                                   | 0.030 $\pm 0.003$         | 0.023 $\pm 0.001$   | 0.28 $\pm <0.01$ | 0.094 $\pm 0.005$ | 0.15 $\pm 0.01$ | 0.047 $\pm 0.002$ | 0.027 $\pm 0.003$       | 0.14 $\pm 0.01$  | 0.25 $\pm 0.02$   | 0.15 $\pm 0.01$   | 0.32 $\pm 0.02$ | 0.57 $\pm 0.03$   |
| Basalt 38–75 $\mu\text{m}$                                                    | 0.047 $\pm 0.001$         | 0.051 $\pm 0.002$   | 0.19 $\pm 0.01$  | 0.13 $\pm 0.01$   | 0.32 $\pm 0.01$ | 0.065 $\pm 0.002$ | 0.036 $\pm 0.001$       | 0.20 $\pm <0.01$ | 0.39 $\pm 0.01$   | 0.22 $\pm 0.01$   | 0.57 $\pm 0.01$ | 0.64 $\pm 0.01$   |
| Basalt 20–38 $\mu\text{m}$                                                    | 0.059 $\pm 0.002$         | 0.080 $\pm 0.001$   | 0.18 $\pm <0.01$ | 0.23 $\pm 0.01$   | 0.71 $\pm 0.02$ | 0.13 $\pm <0.01$  | 0.054 $\pm 0.001$       | 0.37 $\pm 0.01$  | 0.73 $\pm 0.01$   | 0.34 $\pm 0.01$   | 1.2 $\pm <0.1$  | 1.0 $\pm <0.1$    |
| Sand 100–300 $\mu\text{m}$                                                    | 0.033 $\pm 0.001$         | 0.021 $\pm 0.001$   | 0.26 $\pm 0.01$  | 0.092 $\pm 0.005$ | 0.14 $\pm 0.00$ | 0.043 $\pm 0.001$ | 0.022 $\pm 0.003$       | 0.10 $\pm 0.01$  | 0.21 $\pm 0.02$   | 0.15 $\pm 0.01$   | 0.26 $\pm 0.01$ | 0.52 $\pm 0.03$   |
| <i>Meso-density fraction (<math>1.8\text{--}2.4 \text{ g cm}^{-3}</math>)</i> |                           |                     |                  |                   |                 |                   |                         |                  |                   |                   |                 |                   |
| Granite 38–75 $\mu\text{m}$                                                   | N.A.                      | N.A.                | N.A.             | N.A.              | N.A.            | N.A.              | N.A.                    | N.A.             | N.A.              | N.A.              | N.A.            | N.A.              |
| Basalt 38–75 $\mu\text{m}$                                                    | 0.031 $\pm 0.001$         | 0.054 $\pm 0.002$   | 0.12 $\pm 0.01$  | 0.98 $\pm 0.26$   | 3.7 $\pm 1.0$   | 0.45 $\pm 0.12$   | 0.19 $\pm 0.02$         | 1.1 $\pm 0.1$    | 0.68 $\pm 0.05$   | 1.2 $\pm 0.3$     | 4.9 $\pm 1.1$   | 1.2 $\pm 0.2$     |
| Basalt 20–38 $\mu\text{m}$                                                    | 0.057 $\pm 0.001$         | 0.089 $\pm 0.005$   | 0.22 $\pm 0.01$  | 2.4 $\pm 0.1$     | 9.5 $\pm 0.3$   | 1.2 $\pm <0.1$    | 0.31 $\pm <0.01$        | 1.8 $\pm <0.1$   | 1.2 $\pm <0.1$    | 2.7 $\pm 0.1$     | 11 $\pm <1$     | 2.6 $\pm 0.1$     |
| Sand 100–300 $\mu\text{m}$                                                    | N.A.                      | N.A.                | N.A.             | N.A.              | N.A.            | N.A.              | N.A.                    | N.A.             | N.A.              | N.A.              | N.A.            | N.A.              |
| <i>High-density fraction (<math>&gt; 2.4 \text{ g cm}^{-3}</math>)</i>        |                           |                     |                  |                   |                 |                   |                         |                  |                   |                   |                 |                   |
| Granite 38–75 $\mu\text{m}$                                                   | 0.0 $\pm <0.1$            | 0.0093 $\pm 0.0050$ | 0.0 $\pm <0.1$   | 0.11 $\pm 0.02$   | 0.62 $\pm 0.03$ | 0.12 $\pm 0.02$   | 0.16 $\pm 0.01$         | 1.7 $\pm <0.1$   | 0.65 $\pm 0.02$   | 0.27 $\pm 0.03$   | 2.3 $\pm 0.1$   | 0.78 $\pm 0.04$   |
| Basalt 38–75 $\mu\text{m}$                                                    | 0.059 $\pm 0.009$         | 0.19 $\pm 0.01$     | 0.30 $\pm 0.02$  | 3.1 $\pm 0.1$     | 21 $\pm 1$      | 1.9 $\pm 0.1$     | 0.59 $\pm 0.03$         | 4.0 $\pm 0.2$    | 7.3 $\pm 0.2$     | 3.7 $\pm 0.1$     | 25 $\pm 1$      | 9.5 $\pm 0.2$     |
| Basalt 20–38 $\mu\text{m}$                                                    | 0.11 $\pm <0.01$          | 0.21 $\pm <0.01$    | 0.43 $\pm 0.01$  | 3.5 $\pm 0.1$     | 25 $\pm <1$     | 2.4 $\pm <0.1$    | 0.45 $\pm 0.04$         | 3.7 $\pm 0.5$    | 6.9 $\pm 0.1$     | 4.1 $\pm 0.1$     | 29 $\pm 1$      | 9.7 $\pm <0.1$    |
| Sand 100–300 $\mu\text{m}$                                                    | 0.0 $\pm <0.1$            | 0.0 $\pm <0.1$      | 0.0 $\pm <0.1$   | 0.014 $\pm 0.008$ | 0.13 $\pm 0.09$ | 0.0 $\pm <0.1$    | 0.080 $\pm 0.013$       | 1.2 $\pm 0.2$    | 0.073 $\pm 0.019$ | 0.094 $\pm 0.011$ | 1.3 $\pm 0.3$   | 0.073 $\pm 0.019$ |
| <i>Sum of three fractions</i>                                                 |                           |                     |                  |                   |                 |                   |                         |                  |                   |                   |                 |                   |
| Granite 38–75 $\mu\text{m}$                                                   | N.A.                      | N.A.                | N.A.             | N.A.              | N.A.            | N.A.              | N.A.                    | N.A.             | N.A.              | N.A.              | N.A.            | N.A.              |
| Basalt 38–75 $\mu\text{m}$                                                    | 0.14 $\pm 0.01$           | 0.30 $\pm 0.01$     | 0.60 $\pm 0.03$  | 4.2 $\pm 0.3$     | 25 $\pm 1$      | 2.4 $\pm 0.1$     | 0.82 $\pm 0.02$         | 5.3 $\pm 0.1$    | 8.4 $\pm 0.2$     | 5.2 $\pm 0.3$     | 31 $\pm 1$      | 11 $\pm <1$       |
| Basalt 20–38 $\mu\text{m}$                                                    | 0.23 $\pm <0.01$          | 0.38 $\pm <0.01$    | 0.83 $\pm 0.01$  | 6.1 $\pm 0.1$     | 36 $\pm 1$      | 3.7 $\pm 0.1$     | 0.81 $\pm 0.04$         | 5.9 $\pm 0.5$    | 8.8 $\pm <0.1$    | 7.2 $\pm 0.1$     | 42 $\pm 1$      | 13 $\pm <1$       |
| Sand 100–300 $\mu\text{m}$                                                    | N.A.                      | N.A.                | N.A.             | N.A.              | N.A.            | N.A.              | N.A.                    | N.A.             | N.A.              | N.A.              | N.A.            | N.A.              |

Al, Fe, and Si were extracted sequentially with sodium pyrophosphate, acid oxalate, and dithionite-citrate.

Value shows mean  $\pm$  standard deviation ( $n = 3$ ).

N.A. Not analyzed due to the limited mass recovery of the meso-density fraction.

**Table S12.** Molar ratios of total C to sequentially extracted metals in meso-density fraction for the two basalt treatments after the 55-day incubation.

|                 | Extraction reagent | Meso-density fraction (1.8–2.4 g cm <sup>-3</sup> ) |             |
|-----------------|--------------------|-----------------------------------------------------|-------------|
|                 |                    | C:Al                                                | C:Fe        |
| Basalt 38–75 μm | PP + OX            | 2.3 ± 0.9                                           | 1.3 ± 0.5   |
|                 | PP + OX + DC       | 1.9 ± 0.7                                           | 1.0 ± 0.3   |
| Basalt 20–38 μm | PP + OX            | 1.2 ± <0.1                                          | 0.64 ± 0.02 |
|                 | PP + OX + DC       | 1.1 ± <0.1                                          | 0.54 ± 0.01 |

Al and Fe were extracted sequentially with sodium pyrophosphate (PP), acid oxalate (OX), and dithionite-citrate (DC).

Value shows mean ± standard deviation ( $n = 3$ ).

**Table S13.** Cell number and alpha diversity index of the bacterial community in the meso-density fraction (1.8–2.4 g cm<sup>-3</sup>;  $n = 1$ ) for granite, coarse basalt, and fine basalt treatments and bulk for all four treatments ( $n = 3$ ) on Day 55 compared to bulk in the initial leaf compost ( $n = 3$ ).

|                  |                       |        | 16S rRNA copy number<br>(copies g <sup>-1</sup> dry soil) | Chao1      | Shannon   | InvSimpson |
|------------------|-----------------------|--------|-----------------------------------------------------------|------------|-----------|------------|
| Granite 38–75 μm | Meso-density fraction | Day 55 | 1.51E+09                                                  | 1833       | 5.3       | 23         |
|                  | Bulk                  | Day 55 | 4.25E+08 ± 7.89E+07                                       | 1923 ± 179 | 6.0 ± 0.1 | 154 ± 17   |
| Basalt 38–75 μm  | Meso-density fraction | Day 55 | 3.85E+08                                                  | 1873       | 5.7       | 56         |
|                  | Bulk                  | Day 55 | 3.70E+08 ± 1.04E+08                                       | 1906 ± 79  | 5.8 ± 0.2 | 91 ± 39    |
| Basalt 20–38 μm  | Meso-density fraction | Day 55 | 5.47E+08                                                  | 1574       | 5.6       | 77         |
|                  | Bulk                  | Day 55 | 3.84E+08 ± 3.97E+07                                       | 1750 ± 76  | 5.7 ± 0.1 | 103 ± 23   |
| Sand 100–300 μm  | Bulk                  | Day 55 | 6.20E+08 ± 1.21E+08                                       | 1788 ± 115 | 5.7 ± 0.2 | 122 ± 27   |
| Leaf compost     | Bulk                  | Day 0  | 9.49E+08 ± 2.39E+08                                       | 1849 ± 52  | 6.1 ± 0.0 | 170 ± 10   |

Value shows mean ± standard deviation ( $n = 3$  for bulk samples).

**Table S14.** Mantel test showing the correlations between the bacterial composition and the mineral properties in the meso-density fraction for granite, coarse basalt, and fine basalt treatments on Day 55 (1.8–2.4 g cm<sup>-3</sup>;  $n = 1$ ), the bulk for all four treatments on Day 55 ( $n = 3$ ), and the bulk for the initial leaf compost ( $n = 2$ ).

| Factor                    | $R^2$       | $P$ value |
|---------------------------|-------------|-----------|
| <b>TC</b>                 | <b>0.86</b> | 0.001     |
| <b>TN</b>                 | <b>0.86</b> | 0.002     |
| <b>pH(KCl)</b>            | <b>0.82</b> | 0.001     |
| <b>pH(H<sub>2</sub>O)</b> | <b>0.80</b> | 0.001     |
| <b>Fe<sub>pp</sub></b>    | <b>0.30</b> | 0.013     |
| <b>Al<sub>pp</sub></b>    | <b>0.22</b> | 0.04      |
| Fe <sub>ox</sub>          | 0.22        | 0.068     |
| Al <sub>ox</sub>          | 0.14        | 0.286     |

Significant mantel coefficient is shown in bold.

Al and Fe were extracted sequentially with sodium pyrophosphate (PP), acid oxalate (OX), and dithionite-citrate.

## Figures S1-S4

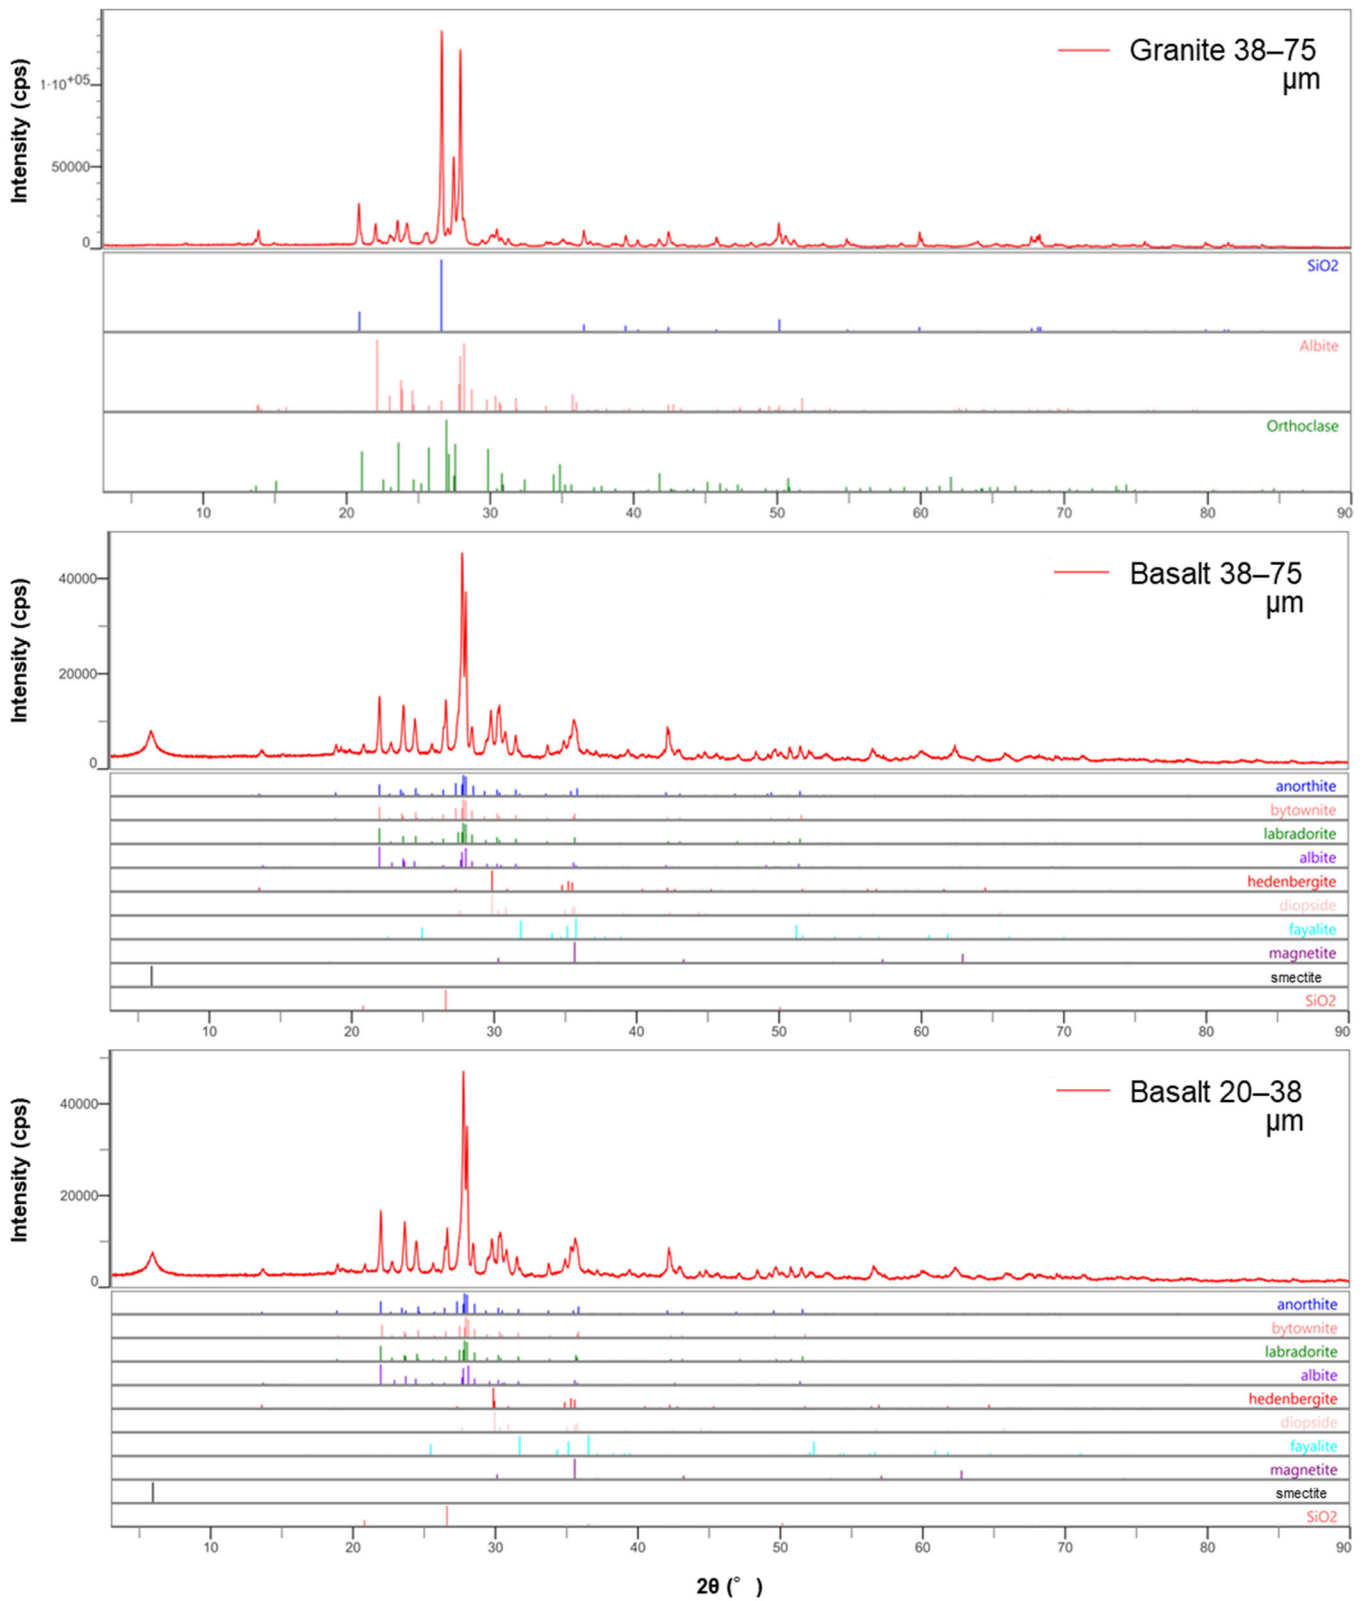

**Figure S1.** Mineralogical composition of the crushed rocks (granite, coarse basalt, and fine basalt) used in this experiment.

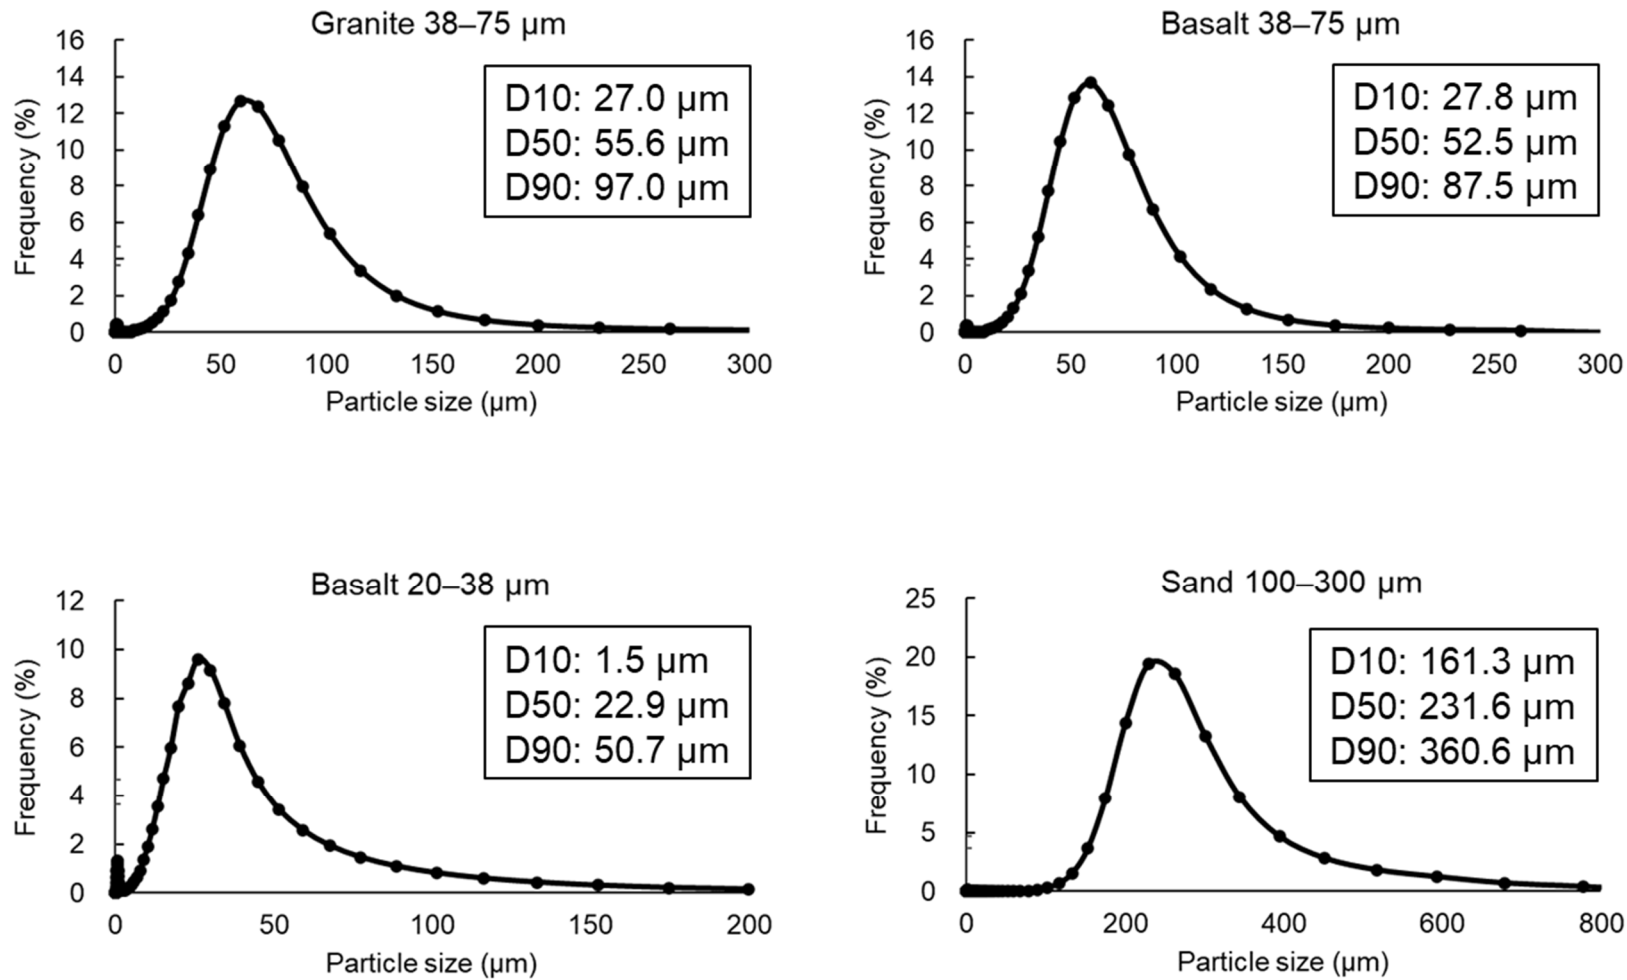

**Figure S2.** Particle size distribution of the crushed rocks (granite and basalt) and sand used in this experiment.

The granite (target size: 38–75 μm) had the mean weight diameter (MWD) of 63.9 μm and the cumulative percentile values (the grain size at which 50% of the grains are coarser, D50) of 55.6 μm (Fig. S1). The coarse basalt (38–75 μm) had a MWD of 59.8 μm and D50 of 52.5 μm. The fine basalt (20–38 μm) had a MWD of 28.8 μm and D50 of 22.9 μm. The sand (100–300 μm) had a MWD of 267.3 μm and D50 of 231.6 μm.

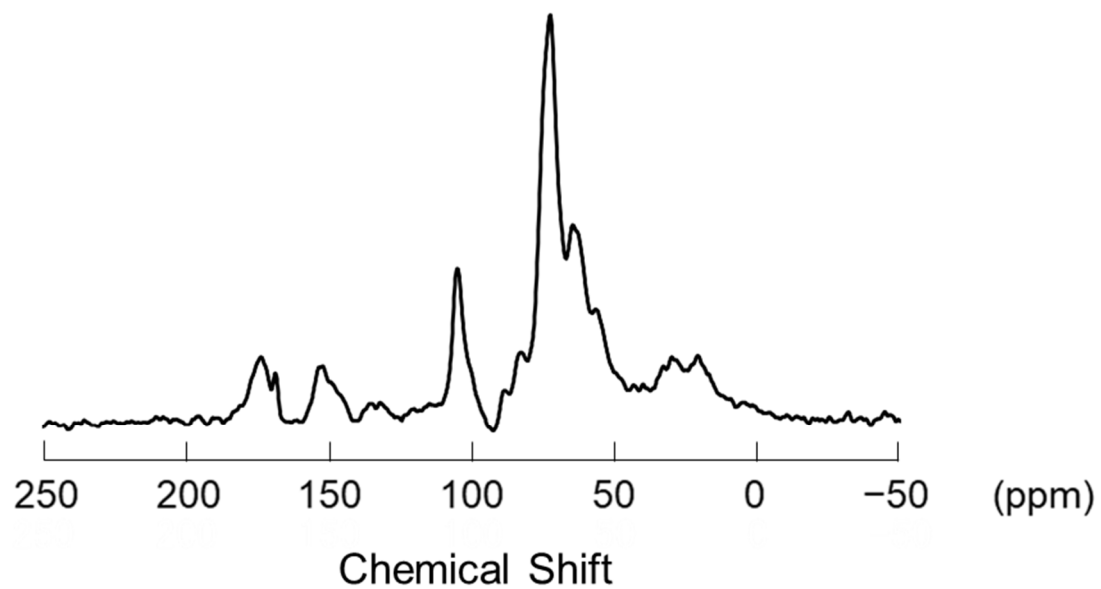

| C type     | (%) |
|------------|-----|
| Carbonyl-C | 7.7 |
| Aromatic-C | 9.6 |
| O-alkyl-C  | 63  |
| Alkyl-C    | 19  |

**Figure S3.** Solid-state MS  $^{13}\text{C}$  NMR spectrum and the proportion contributed by each C type to the total signal intensity in leaf compost used as a source of OM in this experiment.

Granite  
38–75  $\mu\text{m}$

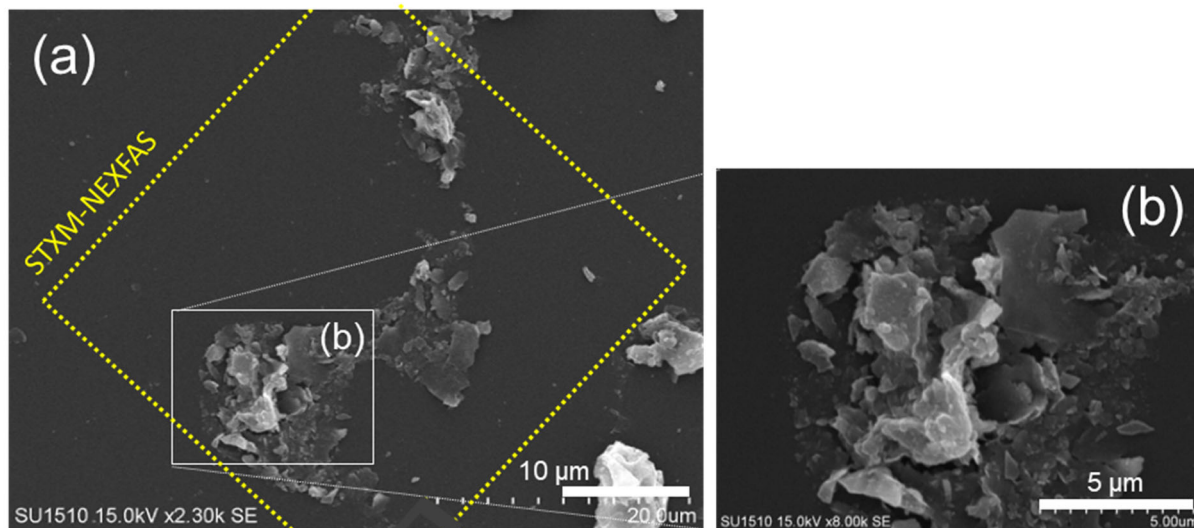

Basalt  
38–75  $\mu\text{m}$

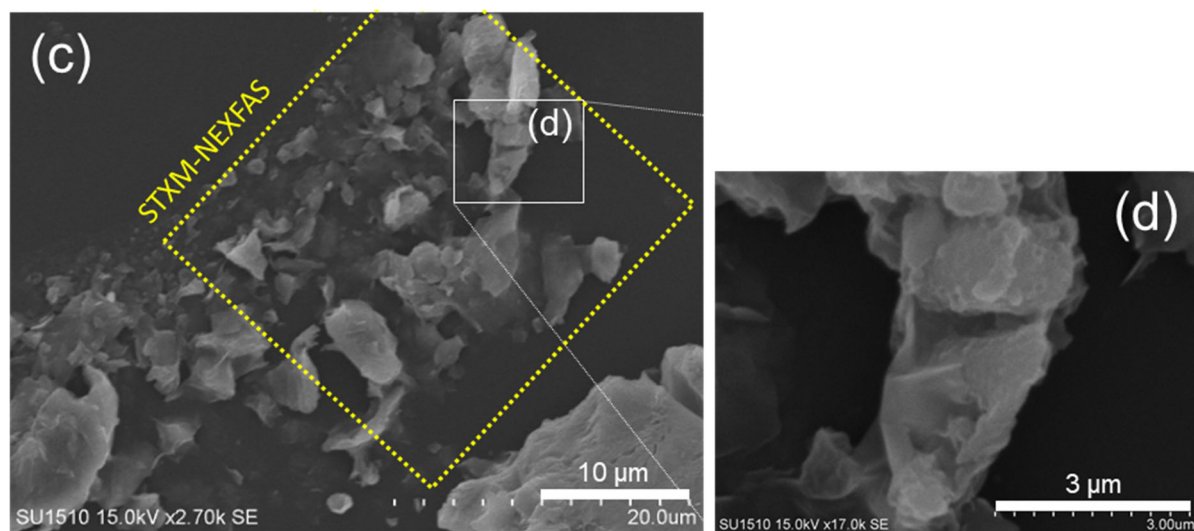

**Figure S4.** SEM images of dispersed particles from the meso-density fractions prepared for STXM-NEXAFS. Granite sample (a) and (b), and coarse basalt sample (c) and (d) after the incubation. The yellow dotted box in (a) and (c) represents the ROI used for STXM-NEXAFS analysis shown in Fig. 7 (A) and Fig. 7 (B), respectively. ROI (b) and (d) correspond to the higher resolution images used for STXM C optical density shown in Fig. 7 (a) and Fig. 7 (b), respectively.
